# Supplementary material
Source: HighWire-hosted journal article supplement (doi:10.1101/rna.031286.111)
Supplement: SuppFigLegends.docx [file SuppFigLegends.docx]

**Figure S1**. Representative in-line probing gel image of VCIIIs. NR, T1, and OH represent no reaction, partial digestion with RNase T1, and partial digestion with alkali, respectively. r2-r7 indicate regions defined in Table 2.

**Figure S2**. Alignment of leader-linker P0 helix connected to P1 helix with simple internal loops in 22 of 55 tandem glycine riboswitch sequences reported by Breaker and coworkers (Mandal et al. 2004). Abbreviations of the names of the organisms are taken from the same article. Green, yellow, purple, and grey regions indicate P0 helix, internal loop, P1 helix of aptamer I, and P1 helix of aptamer II, respectively.

**Figure S3**. (*A*) and (*B*) show the in-line probing gel images of VCLD and VCIII, respectively. T1 and OH represent partial digestion with RNase T1 and partial digestion with alkali, respectively. r2-r7 indicate regions defined in Table 2.

**Figure S4**. (*A*) and (*B*) show the in-line probing gel images of FNLD and FNIII, respectively. NR represents no reaction. r2-r7 indicate regions defined in Table 2.

**Figure S5**. (*A*) and (*B*) show the in-line probing gel images of BSLD and BSIII, respectively. NR, T1, and OH represent no reaction, partial digestion with RNase T1, and partial digestion with alkali, respectively. r2-r7 indicate regions defined in Table 2.

**Figure S6**. (*A*) and (*B*) show the hydroxyl radical footprinting gel images of VCIII and VCLD, respectively. NR, T1, and OH represent no reaction, partial digestion with RNase T1, and partial digestion with alkali, respectively. *a (nts 200-202), *b (nts 170-172), *c (around nt 146), *d (around nt 123) and *e (around nt 82), as indicated in Figure 1, represent the glycine-induced protections in VCIII, which correlate well with previous reports (Lipfert et al. J. Mol. Biol. 2007, 365, 1393; Erion and Strobel RNA 2011, 17, 74).

**Figure S7**. (*A*) and (*B*) show the hydroxyl radical footprinting gel images of FNIII and FNLD, respectively. NR, T1, and OH represent no reaction, partial digestion with RNase T1, and partial digestion with alkali, respectively. *a (nts 134-136), *b (nts 117-119), *c (nts 110-112), *d (nts 85-86), and *e (nts 63-67) represent the glycine-induced protections in FNIII.

**Figure S8**. (*A*) and (*B*) show the hydroxyl radical footprinting gel images of BSIII and BSLD, respectively. NR and T1 represent no reaction and partial digestion with RNase T1, respectively. X represents the lane below a damaged well without sample loading. *a (around G121), *b (around G97), *c (around C88), and *d (around G60) represent the glycine-induced protections in BSIII.

**Figure S9**. Native gel assay of glycine riboswitch compaction on 6% non-denaturing PAGE in 5 mM MgCl2 and 5 mM glycine (*A*) and 5 mM MgCl2 and no glycine (*B*). These two gels were prepared in two different halves of the same gel cassette separated by a spacer to ensure identical running conditions. Lane 1 and 5, VCLD; Lane 2 and 6, VCIII; Lane 3 and 7, VCIIIs; Lane 4 and 8, VCIIIG146C.
